# Supplementary material for: 99mTc-A1 as a Novel Imaging Agent Targeting Mesothelin-Expressing Pancreatic Ductal Adenocarcinoma
Source: MDPI journal article supplement (doi:10.3390/cancers11101531), 2019-10-10
Supplement: s1 [file s1]

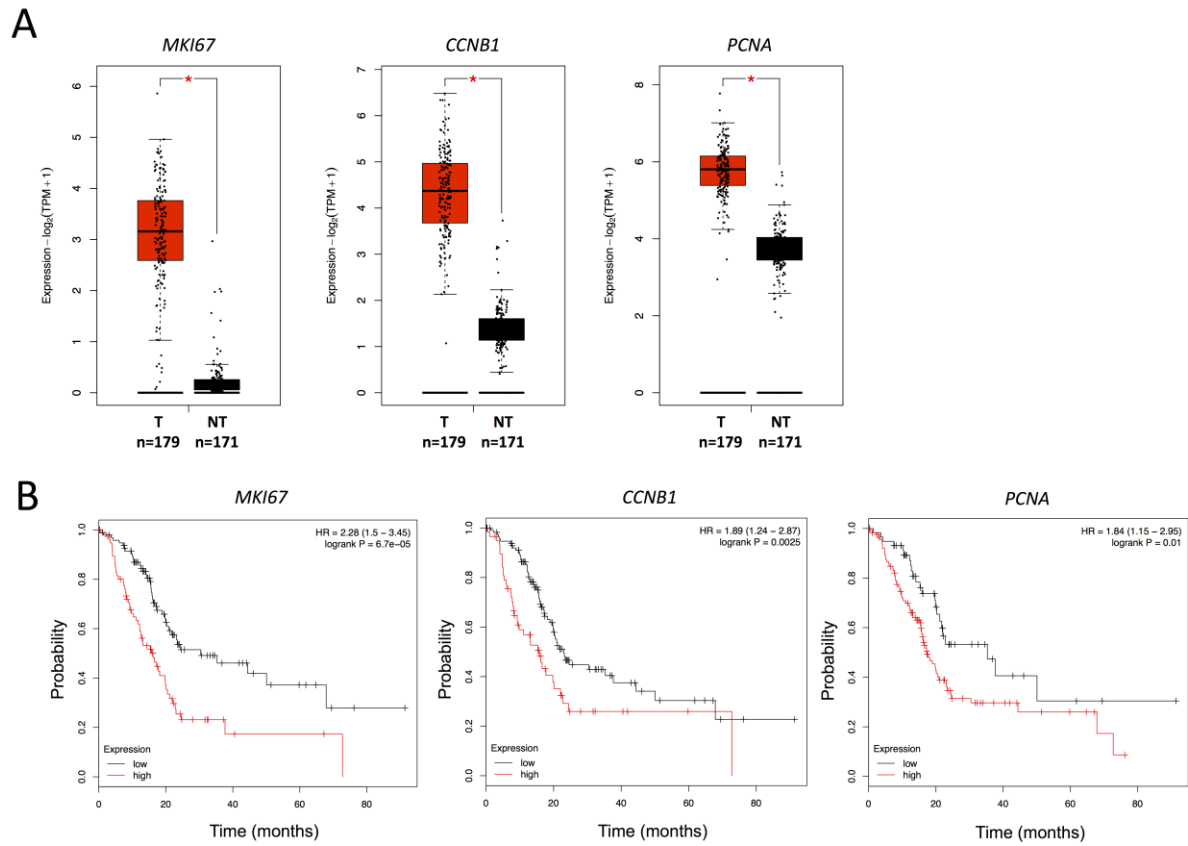

**Figure S1.** Markers of proliferation are associated with decreased overall survival in patients with PDAC. **(A)** The expression of *MKI67*, *CCNB1* and *PCNA* in tumoral (T) and non-tumoral (NT) pancreatic tissues from TCGA and GTEx datasets. The red and gray boxes represent PDAC and non-tumoral-derived tissues respectively; (T: n = 179 and NT: n = 171). **(B)** KM plots of Overall survival probability (plotted on Y-axis) of PDAC cancer patients is shown (TCGA data, n = 177). Patients have been stratified into high (red lines) or low (black lines) expression-based ‘risk-groups’ by their gene-expressions of *MKI67*, *CCNB1* and *PCNA*. The patient follow-up is indicated in months on the X-axis. Respective Log-rank test P-value and HR are shown and were calculated at the best auto-selected cut-off.

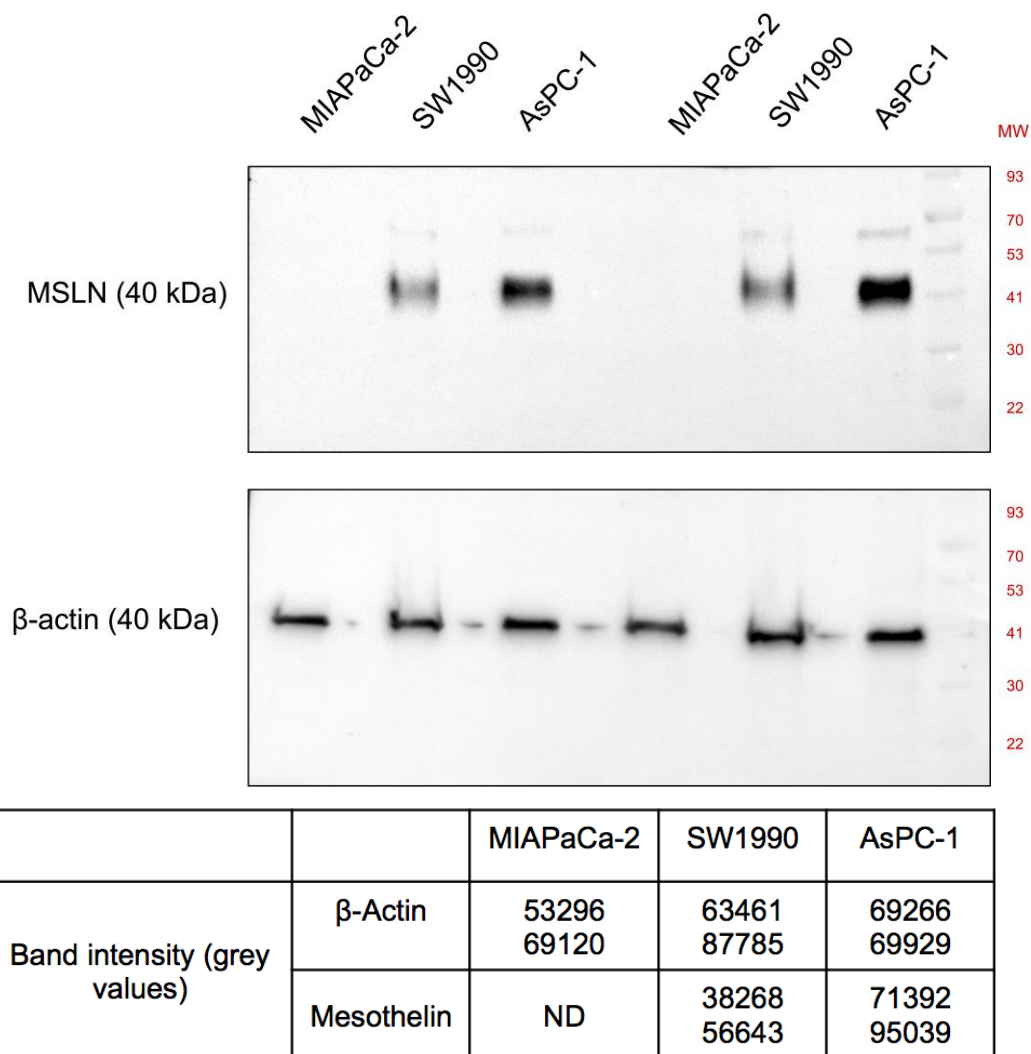

**Figure S2.** Mesothelin expression of MIAPaCa-2, SW1990 and AsPC-1 was assessed by Western Blot. MW: Molecular Weight. Whole blots pictures depicting mesothelin and  $\beta$ -actin protein levels (n = 2). Grey values of bands are indicated in the table. ND: Not detected.
